# Supplementary material
Source: Springer Nature journal article supplement (https://www.springermedizin.de/resource/supplementary/13054_2011_9790_MOESM1_ESM.pdf/9707006)
Supplement: MOESM1 [file 9707006]

**CELEG study**  
(n=1302)

**Severe sepsis only**  
(n=776)

**Severe sepsis + ALI**  
(n=526)

APRV (n=21)  
HFOV (n=3)

Height unavailable  
(n=81)

Assume no LPV

Assume all LPV

**421 subjects analyzed**

Sensitivity analysis  
(n=502)
